# Supplementary material for: Inflammatory mediator ultra-low-molecular-weight hyaluronan triggers necrosis of B-precursor leukemia cells with high surface CD44 expression
Source: PubMed Central journal article supplement (PMC5520907; doi:10.1038/cddis.2017.249), 2017-06-01
Supplement: cddis2017249x1.pdf [file cddis2017249x1.pdf]

## Supplementary figure 1

Genomic DNA (Exon 2) of CD44

Target PAM

5' ATGGTCGCTACAGCATCTCTCGGACGGAGGCCGCTGA 3'

### (a) Partial sequences of clones

WT: 5' ATGGTCGCTACAGCATCTCTCGGACGGAGGCCGCTGA 3'  
Clone 1: 5' ATGGTCGCTACAGCATCTCTCGGACGGAGGCCGCTGA 3'  
Clone 2: 5' ATGGTCGCTACAGCATCTCTCGGAC**CC**ACGGAGGCCGCTGA 3'  
Clone 3: 5' ATGGTCGCTACAG-----GACG-----CTGA 3'  
Clone 4: 5' ATGGTCGCTACAGCATCTCTCGGA**AA**CCGGAGGCCGCTGA 3'  
Clone 5: 5' ATGGTCGCTACAGCATCTCTCGGA**GGG**CGGAGGCCGCTGA 3'  
Clone 6: 5' ATGGTCGCTACAGCATCTCTCGGA**TT**CCGGAGGCCGCTGA 3'  
Clone 7: 5' ATGGTCGCTACAGCATCTCTCGGA**CGGC**CGGAGGCCGCTGA 3'

### (b) Predicted amino acid sequences

WT: 28-TCRFAGVFHVEKNGRYSISRTEAADLCKAFNSTLPTM  
Clone 1: 28-TCRFAGVFHVEKNGRYSISRTEAADLCKAFNSTLPTM  
Clone 2: 28-TCRFAGVFHVEKNGRYSISRT**T**EAADLCKAFNSTLPTM  
Clone 3: 28-TCRFAGVFHVEKNGRY**RTLTSARLSIAPCPQWPRWRKL\***  
Clone 4: 28-TCRFAGVFHVEKNGRYSISR**K**PEAADLCKAFNSTLPTM  
Clone 5: 28-TCRFAGVFHVEKNGRYSISR**RA**EAADLCKAFNSTLPTM  
Clone 6: 28-TCRFAGVFHVEKNGRYSISR**I**PEAADLCKAFNSTLPTM  
Clone 7: 28-TCRFAGVFHVEKNGRYSISRT**AGGR\***
